# Supplementary material for: NPM-ALK Is a Key Regulator of the Oncoprotein FOXM1 in ALK-Positive Anaplastic Large Cell Lymphoma
Source: PubMed Central journal article supplement (PMC6721812; doi:10.3390/cancers11081119), 2019-08-06

Supplementary Materials

## NPM-ALK Is a Key Regulator of the Oncoprotein FOXM1 in ALK-Positive Anaplastic Large Cell Lymphoma

Moinul Haque, Jing Li, Yung-Hsing Huang, Meaad Almowaled, Carter J. Barger, Adam R. Karpf, Peng Wang, Will Chen, Suzanne D. Turner and Raymond Lai

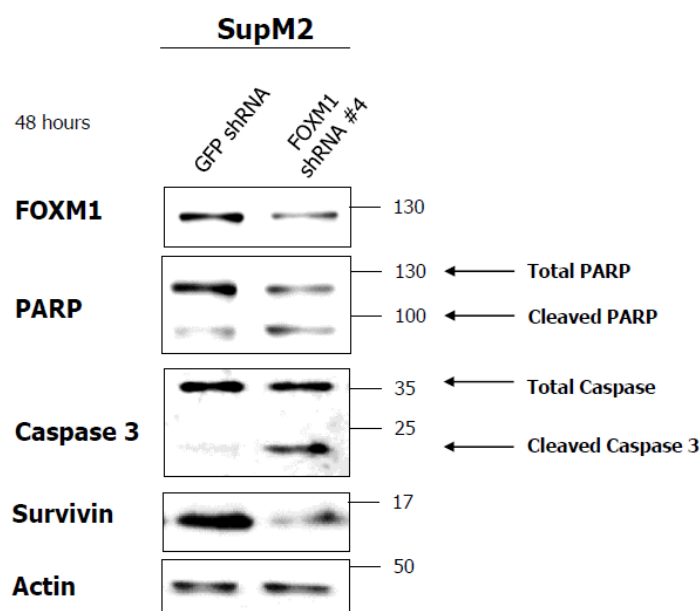

**Figure S1.** Downregulation of FOXM1 induces apoptosis. Western blot analysis of SupM2 cells infected with FOXM1 shRNA for 48 hours showed cleavage of PARP and caspase 3, markers of apoptosis. Moreover, the expression of an anti-apoptotic protein, Survivin, was dramatically reduced.  $\beta$ -actin served as the loading control. Data are representative of three biological replicates.

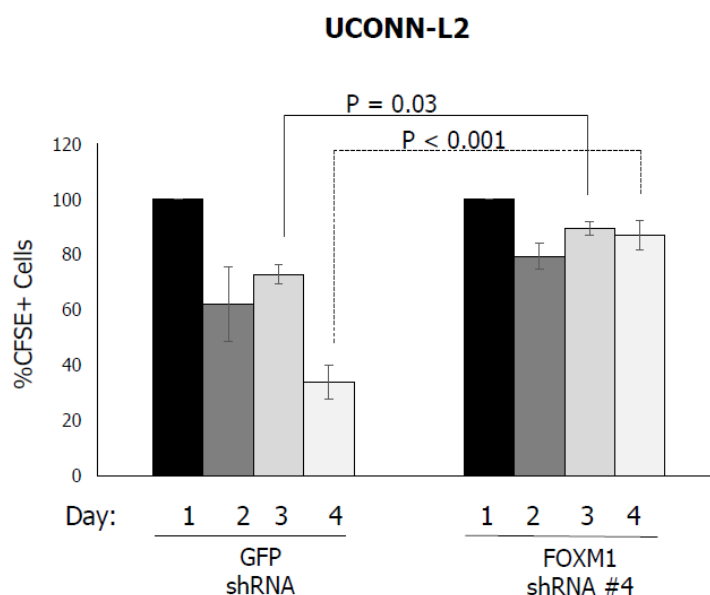

**Figure S2.** FOXM1 shRNA significantly inhibits cell division in UCONN-L2. Infection of UCONN-L2 with FOXM1 shRNA significantly preserved the CFSE content, as compared to cells treated with GFP shRNA on day 3 and day 4. Data are representative of two biological replicates.

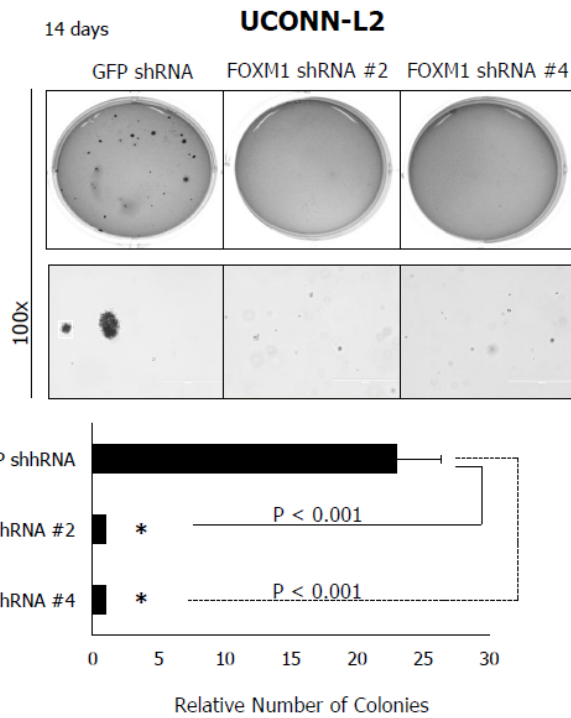

**Figure S3.** shRNA knockdown of FOXM1 largely abrogates soft agar colony formation in UCONN-L2 cells. Soft agar colony formation of UCONN-L2 cells infected with either GFP shRNA or FOXM1 shRNA was evaluated. The boxed area (middle right panel) shows the cut-off size for a colony to be counted. Data are representative of two biological replicates.

### SupM2-FOXM1C Tet On

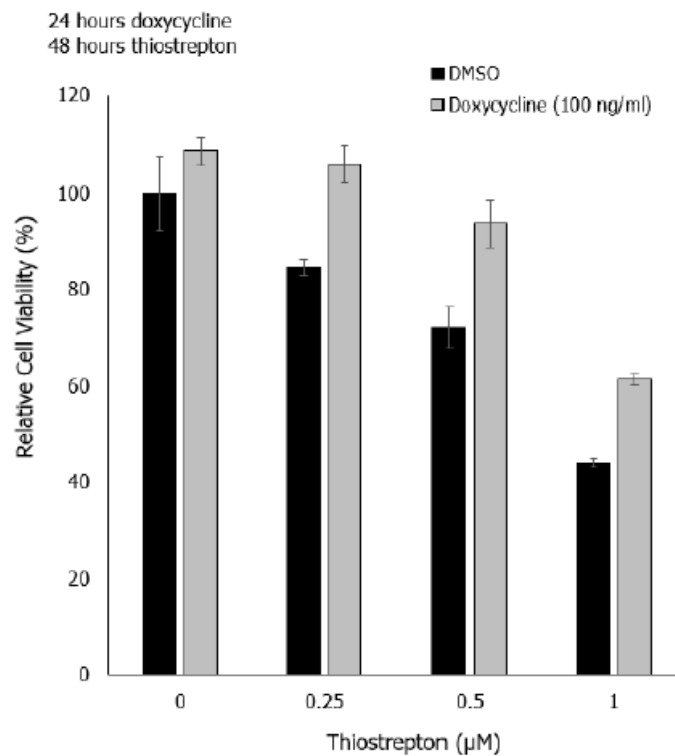

**Figure S4.** Overexpression of FOXM1 provides resistance to thiostrepton mediated growth inhibition of FOXM1 in a tetracycline inducible FOXM1 SupM2 cell line.

**Figure 1A**

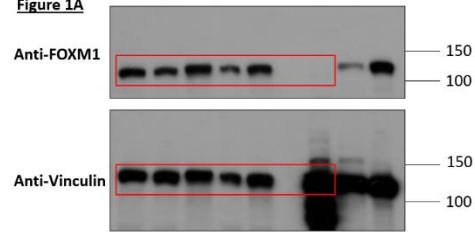

**Figure 1B**

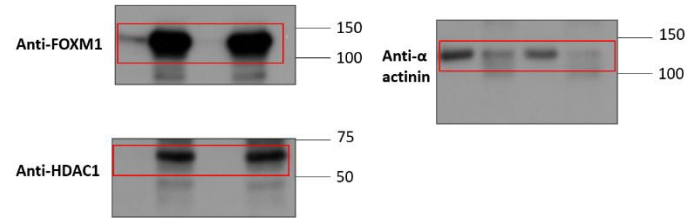

**Figure 3B**

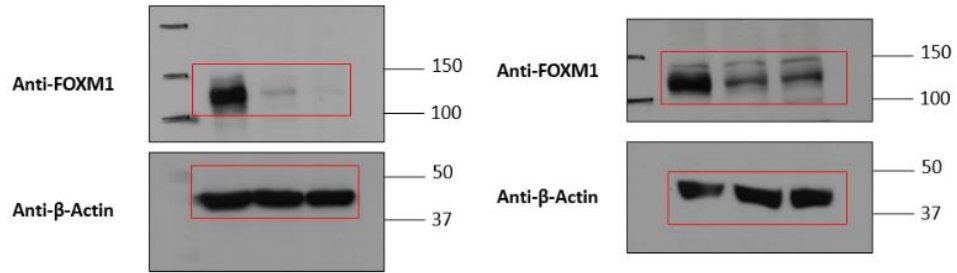

**Figure 4B**

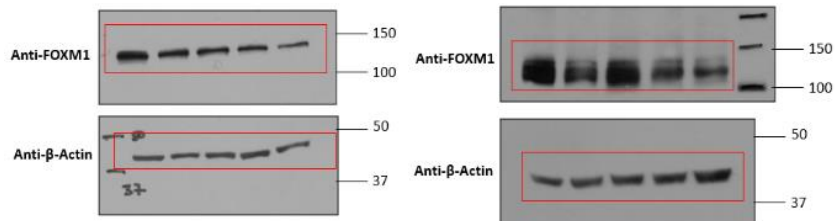

**Figure 4C**

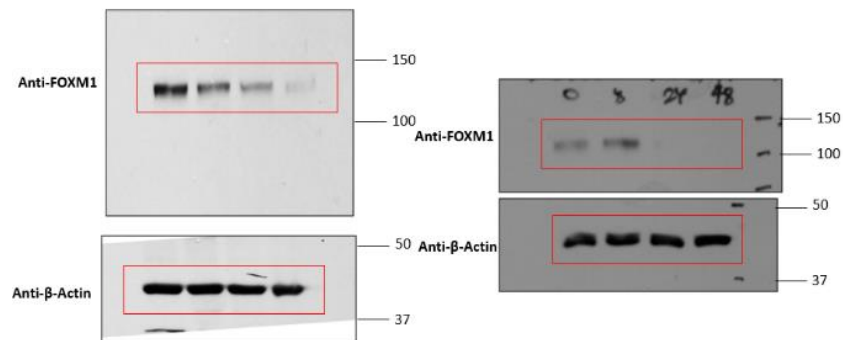

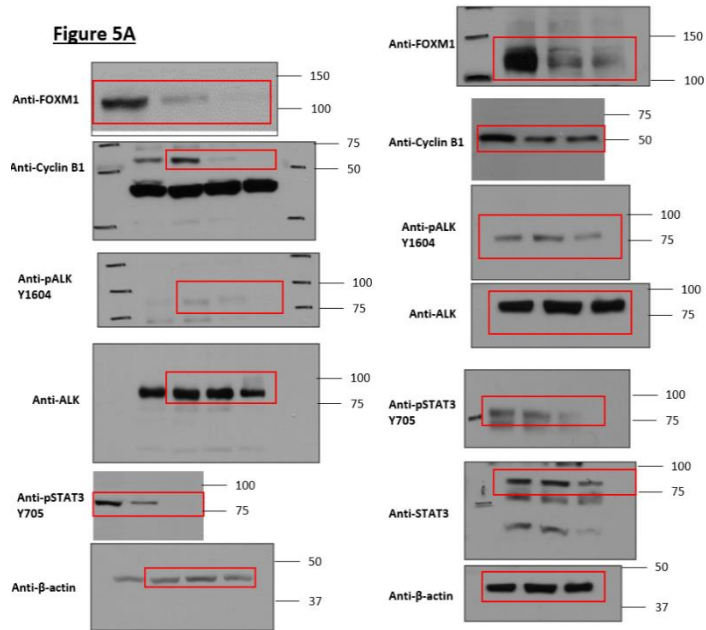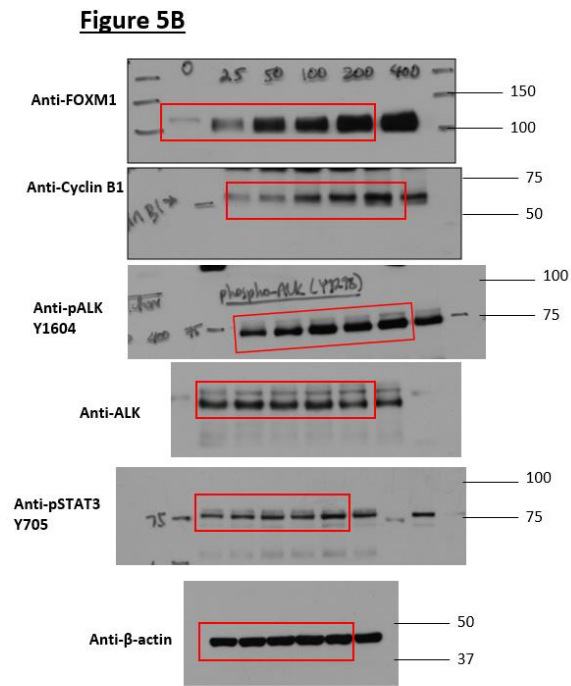

**Figure 6**

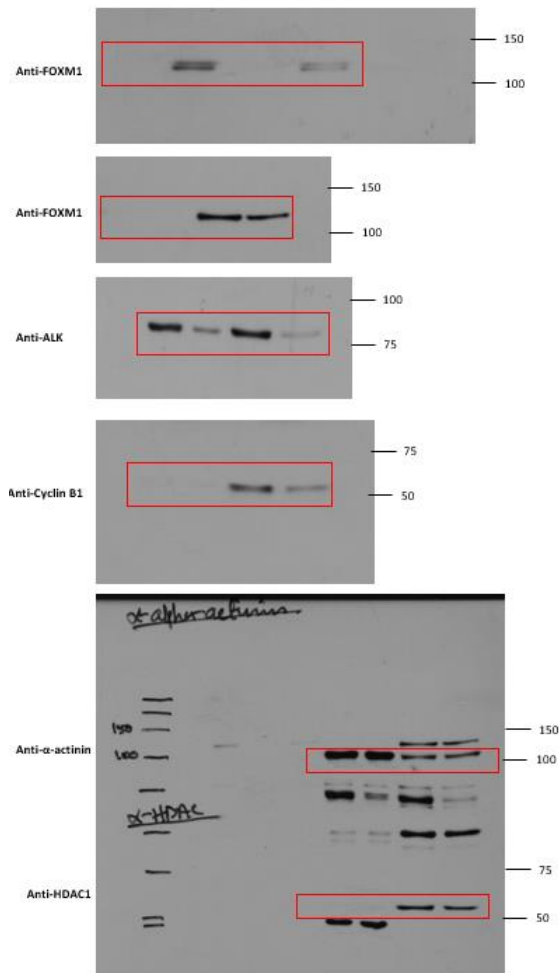

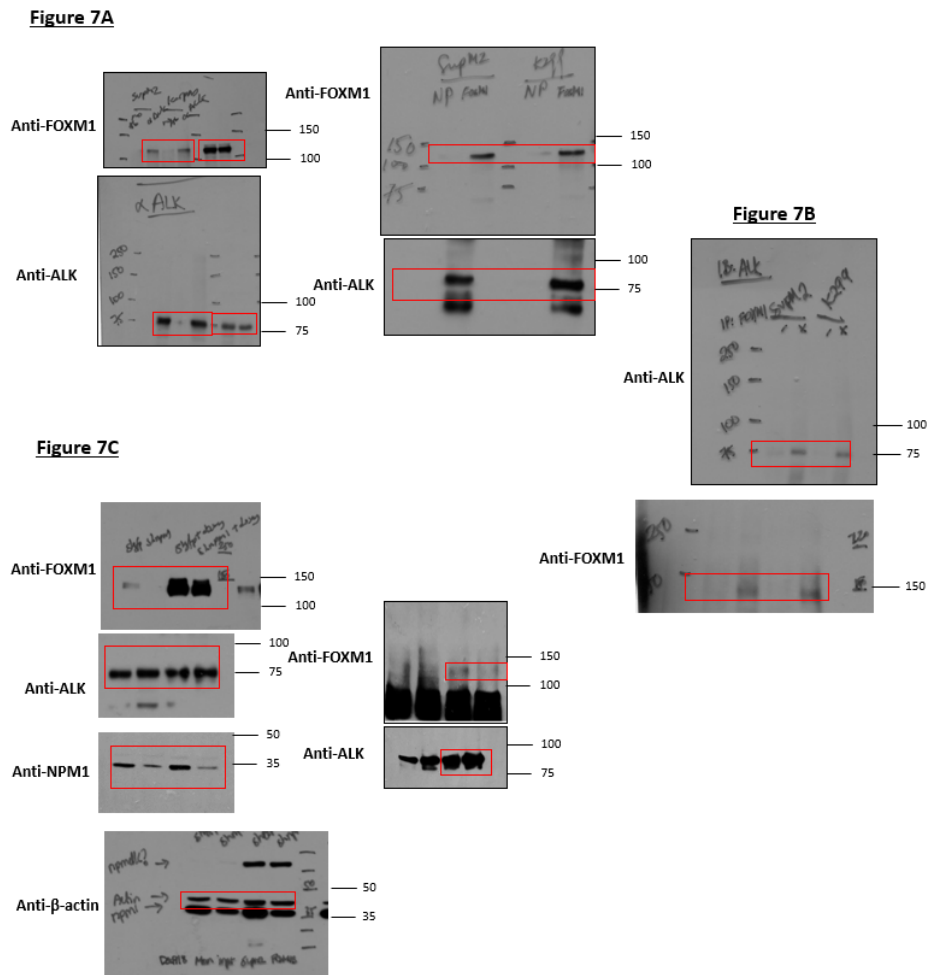

Figure S5. Uncropped western blot films.

Table S1. PCR primer sets used in the study.

| RT-PCR Primer Sequences (Figure 1B)              |                          |
|--------------------------------------------------|--------------------------|
| Primers                                          | Sequence                 |
| FOXM1-isoforms (F)                               | CACCCCAGTGCCAACCGCTA     |
| FOXM1-isoforms (R)                               | AAAGAGGAGCTATCCCCTCCTCAG |
| GAPDH (F)                                        | GGTCTCCTCTGACTTCAACAGCG  |
| GAPDH (R)                                        | ACCACCCTGTTGCTGTAGCCAA   |
| Quantitative RT-PCR Primer Sequences (Figure 2A) |                          |
| Primers                                          | Sequence                 |
| FOXM1 (F)                                        | CGTCGGCCACTGATCTCAAAA    |
| FOXM1 (R)                                        | GGCAGGGGATCTCTTAGGTTC    |
| GAPDH (F)                                        | GGTCTCCTCTGACTTCAACAGCG  |
| GAPDH (R)                                        | ACCACCCTGTTGCTGTAGCCAA   |
| ChIP PCR Primer Sequences (Figure 6C)            |                          |
| Primers                                          | Sequence                 |
| Cyclin B1 Prom 1 (F)                             | CGCGATCGCCCTGGAAACGCA    |
| Cyclin B1 Prom 1 (R)                             | CCCAGCAGAAACCAACAGCCGT   |
| Cyclin B1 Prom 2 (F)                             | CCTCCAACCCAGAGAGTTGTTGC  |
| Cyclin B1 Prom 2 (R)                             | AGCCAAGGACCTACACCCAGCA   |

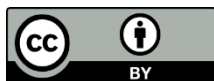

Supplement: cancers-11-01119-s001.pdf [file cancers-11-01119-s001.pdf]
